# Supplementary material for: Contrasting Patterns of Transposable-Element Insertion Polymorphism and Nucleotide Diversity in Autotetraploid and Allotetraploid Arabidopsis Species
Source: Oxford University Press journal article supplement (doi:10.1534/genetics.107.085761), 2008-05-01
Supplement: sup.mat.s2.xls [file sup.mat.s2.xls]

## Sheet: Feuil1
Sample/sequences Categories Clone Accession number(based on A.lyrata*)					A. thaliana match			A. thaliana clone			lyrata match	final annotation
Arabidopsis arenosa
A3
GGTTCGGTTAATCGGTTAGCTGTTTTTTTGCCCAGGCCTA
AAGGTACGCTTGATATGATTGCAGATGGTGAGCATGTATAA
CCTAATCTTCAGTGAATTCAGCAATCACAATTATACTATGG Chromosome 3/ 100 bp F7O18 ......										FBNX253613.b1	seems to be pseugene-related match in intergenic region	intergenic
TGACAATCTCTGAAATCTTGAAGAACAATGGACTGGCAACAG from intronic
AGAAGAGTAAGTAAAATCTCTTTTCTTATCATCAACGTTTAT
CTACTCGTCAAATCATAATTTCAAGAATTTGGGTCATCTTTG
TTATGTGTTTAAAACATGCAAGGAGAGGACAGCGATTCTCGTAC
GGTTCGGTTAATCGGTTAGCGGTTTTTTTTGCCCAGGCCTAA
ACAGAGGTCACCTTACCGACCGAATCCGATATATGGGCCCTAA
ATTTGAGTTACATGGGCCTTAATATTCTAACTAAGCATACATT
CGAATCCTGACCCATGAAGAGTGGTGCAGCAATCATTGCATTT Chromosome 5/ 100 bp
ATAAAATCTCCTTTCTTTTGTTTTATCCCCCCAATTCGCGTTT from exonic-DC1 domain MDF20 .......										FAFH395092.b1	100 bp from exonic-difficult to infer insertion location	n/a
TCTTCTACACCTTCTATTTTGCCTTCACAAATCTCACACCAGT containing protein
CTGGTTGATCACTTGCCTCTTTTCCATCACAAATCATGCAAGG
AGAGGACAGCGATTCTCGTAC
GGTTCGGTTATTCGGTTAGCGGTTTTTTTGCCCAGGCCTAAAT Intergenic MDA7 .......												intergenic
ATTTGCATATAAGAGTTTAGGTCATGCAAGGAGAGGACAGCGA
TTCTCGTAC
GGTTCGGTTATTCGGTTAGCGGTTTTTTTGCCCAGGCCTACTGA
AAGTGATTTAGTTGACTAATGTTGTGCTATATTTTTGGACGAGCT
GGGATATTTCTGTTAGTGGCAATTATCATCAAATATGAAACTAAA
CGTTCACACAAAAGGTTAACAATGGCGTGGCGAAATTAAAAACCT Chromosome3/intergenic MIL23 .............												intergenic
CTTATTTTCTTTACTTTAGGCATAAATAATGGAAAATCTCGGAGA
CAATACCATTAGCTCCACAAAATGAAAAAGGTTGACGTGTTATAA
TTCTGTTGGTTAACTAATTTAGAGGACTAGTTTCAATTCCACCA
AGGCTCGTTCGAGTAGTTCCAATTCTTTAAGTACGAACCATAATG
AGTTTTGTTTTGACTTATGATAACTTGACGAAACTTCGGAGGTGC
TGACCCGCGGCGAGGCGGAGATGACCTCAGGACAGCTTTTTATTG
TCATGCAAGGAGAGGACAGCGATTCTCGTAC
GGTTCGGTTAATCG
GTTAGCGGTTTTTTTGCCCAGGCCTATATCATAGTATGTCTTAAAGTAAA
AGTTCTTTTTGTTGTTTTGTTTGTTTCTTCTGAATGCGTGAAGTTGATGT
TGATTATTTGTGTTTCTACTACGTTCACAACCACAAAACATTATGAATAT Chromosome 1/intergenic F10D13 ...........												intergenic
CAGCTTTTTGTTTTATTTTCTTGTAACATTTCAATAATTTGGAAAGAGGA
ACATATCATCAACAATCAAAACTCCAACTATAGTAATTTAATCACATTTC
AATATCACATCAAAGCCAAACTTTCAACCAAAACACTCGAAAACTAAAGA
GTAGTTGATTACTATTAGGGACTCGAAAGTTAGCAAATGTTAAATTCAAA
TTGTCATGCAAGGAGAGGACAGCGATTCTCGTAC
GGTTCGGTTAATCG
GTTAGCGGTTTTTTTGCCCAGGCCTACTGCCAATCATCATACGTAAGCTC
AAACTTTCACCAAATTTAGTGATAAAAAAGTATTTTAGGAATGAAAAGAA					Chromosome5/intergenic			MXC20				intergenic
TCACAAGTCAGGGTTTGTGTGTCAGGAACACGTGCATCAAACGAATGTCA
CGTGATCATTTTGTAGGGTGCAAATATAATTGCACATCCAAGAGTGGAAG
GTGTGGCCAATAGACAAATTGCAGAAAAGATGATTCAACCTTCTTCTATT
AAAAGTTGTAGCATAAAGGCATCACTCTTATTACAAGACGTGCAAGGACA
TGCAAGGAGAGGACAGCGATTCTCGTAC
GGTTCGGTTATTCGG
TTAGCGGTTTTTTTGCCCAGGCCTATAAAGAAGAATACGTATGGTGTTTT					Chromosome2/intergenic MJB20							intergenic
GATCTTACTTCAGACAATAATATAGAAAGAAAATAAAAAGTCTTTGTTTT
ATTGAAAGCATGCAAGGAGAGGACAGCGATTCTCGTAC
GGTTCGGTTATT
CGGTTAGCGGTTTTTTTGCCCAGGCCTATCTGTAGAGATGCACTGCACAT
GCACCGTGTTTAGCAAGAGGGTAGACTGTTCGCAATGCAGAGTAGATGGA mutator transposase F15C21 .........												intergenic
ATTGTGTCTGTCAGAAACAAATACCAAGTCAGCAGAATCTGGAAGGATGG
AGACAAGTTGGTTGAAAAACCATGCAAGGAGAGGACAGCGATTCTCGTAC
GGTTCGGTTAATCGG
TTAGCGGTTTTTTTGCCCAGGCCTAATAAAAATGATAAAGAAAATAAAAA
TTTGACAATTTTCTAAAGCATGATGAAAGAGTTCTTGATAAACATAGAAA					no match			-		FBNX126363.b1	present in A. lyrata, but no location information, no match to gene	intergenic
TAATTTGTTGACTAATATATATCCATGCAAGGAGAGGACAGCGATTCTCG
TAC
A4
GGTTCGGTTATTCG
GTTAGCGGTTTTTTTGCCCAGGCCTACACAGAGGTCACCTTACCGACCGA
ATCCGATATATGGGCCCTAAATTTGGGTTACATGATTATGCTTACTATTA
CGATCCGTGTTCCGAATCTGTCCACGGCTTGGTATGTTTCGGAGATTTTT Chromosome4/ 70bp from
ACAAGATCGTAGTTTGGAATCCTTCAATGAGACAACATATTACCTTACCC exonic, F box family protein F7J7 .............										FAFH320338.b1	70bp from exonic, difficult to determine nature of insertion site	n/a
GAACCCAAACGTAGAGTCAGGTACTTTATACGTAGCTGTTTAGGACACGA
TCCGGTTGAGGATAAGTATAAAGTATTGAGCATCTCAGGCTACCACAAAG
GCCACCACGATCCTCTCGTTTTTACATTGGGACCTCAAGGATCATGCAAG
GAGAGGACAGCGATTCTCGTAC
GGTTCGGTTATTC
GGTTAGCGGTTTTTTTGCCCAGGCCTACTCTCATCCATGCATCCGAAGAA
GATGCCATTGACCTGAAAACAAGTCCCTAACTAATTAAAACACAGTAATA exonic, syntaxin gene SYNTAXIN OF F20B17 ............												exonic
CTTATCTTCTACATAGAGATTATGTAAAGAGAATCACAAGTAGCAGAAAG PLANTS 52
AAGTATTTGATCATGCAAGGAGAGGACAGCGATTCTCGTAC
GGTTCGGTTAATCG
GTTAGCGGTTTTTTTGCCCAGGCCTATTTAAAAGTATTCTCTGAGAGAAT Chromosome1/intergenic F22H5 ...........												intergenic
CTCTTAGCCNTATGCATTGCATATTCAAACCCAACCACATGCAAGGAGAG
GACAGCGATTCTCGTAC
GGTTCGGTTATTCG
GTTAGCGGTTTTTTTGCCCAGGCCTAATAAATGAGAAGAAATGATAAAGA
ATATAACAATGAAGACCACTTGTCTTTTTCGCCCCAGTGCAATTAACCTT Chromosome4/intergenic Contig.n. 43 ............												intergenic
CCCAAAGCAGATTCTCAGCCTTTATATCACCACATATGCATACTTCCATA
CACGTTTCATGCCCTACAGACGTATTAGAAATGATACCTTGGGATGGATG
TAAAGCTAAGCAAATAGCTTCTGCTCCAAGAACCGAGGACTGTGTTGGTT
GTAAAAGATGTGAATCCGCCTGTCCAACGGATTTTTCGAGCGTTCGAGTT
TATTTATGGCATGCAAGGAGAGGACAGCGATTCTCGTAC
GGTTCGGTTATTC
GGTTAGCGGTTTTTTTGCCCAGGCCTACCTACTACACATGACCTTCTACT
TCCCTTTATTGTTTACGCATTTTTTGTTTTGTTTTTTTTTCATATGAAAA
TTAGATTTGGAGTTTTCTCGCCCAATATTCAAGAGTTTCATTTTTCTTAA Chromosome 1/ intergenic T4K22										FAFH379050.g1	intergenic	intergenic
TATATATTTTCACTGTTTTGACGACGTTATTACGTTCATCAATAGTATTT
CCATTTAATATCGTACAGATTTTTATTTTCTTGCAGTGACATTTACTAAT
CAACTAAAAACGATAGAAACTTGTAAGTTATATATATGCATTCTTTAGCA
ACAAAAAAAAGTTATATATATGCATTGAAATATTGAATCTTTGTTCCTTT
ATAAACAGACGATGCAACATGCAAGGAGAGGACAGCGATTCTCGTAC
GGTTCGGTTATTCG
GTTAGCGGTTTTTTTGCCCAGGCCTATTTATTCTTCTCCATTCTTTCTAA SINE element"AtSN2" shared with A. lyrata											SHARED INSERTION WITH A.LYRATA-close to SINE element	intergenic
TTCTCTCTTCCGTTTTTAGTTTCGACATCTATGAGTTCATTAACTGAAAT
ACATGCAAGGAGAGGACAGCGATTCTCGTAC
GGTTCGGTTAAT
CGGTTAGCGGTTTTTTTGCCCAGGCCTATTTTATTGGATCATTTTTCACA Chromsome5/intergenic K19M13 shared with A.thaliana												intergenic
AAATAGTATTTCCTTGGCCTTTGTTTAAGTATTTTTATTACTTAAACCAT								and Care-1
A9
GGTTCGGTTAAT
CGGTTAGCGGTTTTTTTGCCCAGGCCTATATGTAGCTTCTGATTTCTTCC Chromosome 5/exonic
ATGGGTTTACCTTGGAAGAAACCGTAGTTGTAGTCGTTGCCTCCTATCT GDSL-motif lipase/hydrolase family F8F6 ............												exonic
ACCGACCATGCAAGGAGAGGACAGCGATTCTCGTAC protein AT5G03980
GGTTCGGTTAAT
CGGTTAGCGGTTTTTTTGCCCAGGCCTACTTTTGTATAAAAGTCTATAAA Chromosome5/intergenic MTI20 ...............												intergenic
GAGAGAGAATGTGCATGAAAATACGAAAGACAGAGAGAGGGGAAAACAAT
GAAGCAGGTGCATAGGGAGAAGTGCCATGCAAGGAGAGGACAGCGATTCT
CGTAC
GGTTCGGTTAA
TCGGTTAGCGGTTTTTTTGCCCAGGCCTACTTCTATCTATTGCCGCATAA Chromosome1/intergenic F9K23 gnl|ti|1689949297*										FBNX213106.b1	intergenic	intergenic
ATGTCAGTTCAGTTGTTGAACATTTATTAAATGTTAGATTGTTCTTTTGT
TTTTTCCTAAGGCCATCTACCTTTCCACCAAGCGCAGCTACAAAACATGC
AAGGAGAGGACAGCGATTCTCGTAC
GGTTCGGTTATT
CGGTTAGCGGTTTTTTTGCCCAGGCCTACCTGAAACAATCTTCTTCCTAA
CCGAAACCCGGTACGAGATCGGGACGGTTAACAAATAATAACTGGAATTT Chromosome5/intergenic MBM17												intergenic
GCTATAAAGAAAGACCGGTTTACGAGAGAAGAAGATTTATGTCTGTAGAA
ATGGCGAGTTTCGAGAAATTCGAACCCATACTTGGAGAAGTCGTACCCGA
ACGTTCGGATCCGGGTTCGGATCTTCTCCGGCGATGTCTCTTCCACGTCT
ACGCTTCCGATTTGTATAACTTAACAGTCCATGCAAGGAGAGGACAGCGA
TTCTCGTAC
GGTTCGGTTATT
CGGTTAGCGGTTTTTTTGCCCAGGCCTACTTTAGACTAAGAAAATTTGAA
TGACATTGATGATATAGTGAGGCACAAAATATCTGTCTCTAATAATTTCA
GGCTTAATAGACATATTAAATGAGGTTGGAGAATTAATTGAACAGGGAAT Chromosome5/intergenic F8F6												intergenic
ATATAATGTGGTTGTTAGTTCGATAATAATAATTCATTGTGGAAAAATCA
GGAGATATTTCAATTAAGAGACACAAAAGCACATATAGTTGATATTAATA
CTTGTGAGAGGATTCTTAAACAGTAATCAGTGAGAATGTGAGATGTGTTA
TGTGAGTCGTGTTTTACTTTAAAAAATGTTCCAAAAGGTTTAGGTTATAT
ATAGCTTTGACTGAATCATCGTAATCAAGCTTTTCATTGACAATGTAGAG
AAATCATAATCTAAATGATGGATGTAGTAAAAGCAGGCCCATCAAGGTAG
TAAAAGATGTAATAAAGTAAAATAAATAAGAACGCGTTAATGTGGGACCC
TATTTAAACATGCAAGGAGAGGACAGCGATTCTCGTAC
GGTTCGGTTATT
CGGTTAGCGGTTTTTTTGCCCAGGCCTATGGAGAATGTTTGTCTACGTTT
AAAATAAAGATAAGGTTCTTCTTAAATGACGTGTCATTTTATTTATATTT Chromosome1/ intergenic F14O10												intergenic
TATGATAAAGCGTATATACAAATGGGCCTTAATGGGCTTTGACCATCGTC
AAATAACGTGAACAACAAGATATTTTTCCCTTTATGTAATTTTTCCTCAT
TCTTAATTTCGTATTCAAGGGTTCTTTTCTTCAAACCCTAAAAATTTACT
TGTAGGTCAAAATCGAAAATCGATGGGAACTCCAGAATCATCGAGAGAGC
CATGCAAGGAGAGGACAGCGATTCTCGTAC
Care-1
GGTTCGGTTATTCGGTTAGCGGTTTTTTTGCCCAGGCCTAC
TCTGTAGGATCTTCTATTCTGTTTCGTATTATCGTATATAT
ATAGATCGCTATCGTCTTTTTGTTTTCGTTTTTCTCTGTGTT
TTTGTATAATGGATTCAGGTATTAACACTTCTTCACACTTCAA Chromosome4/intergenic M17M5												intergenic
ACCTCAAGCTCGATGCCCACTTCAACGAAACTTCCTCCCCAAGA
AAACTTCCAAAGAAAACGTAAGTGTTTATTTTGCTTATGAATTA
GGGTTTCGATTTTTGGGCTCTGTTTTTAACAATTAGGGTTTCGTTT
TTTTATCTTTTTAGAACATCAATTTTAGTGTTTTATACAATTGGTG
ATTCTCGAATTGTTGGTTCTGTCATAAAAATTGTTTATTTTGGTTTT
TGTCATAAAAATCGTTTCTTTTTGTGATTTTGAATGAATTTGTTGTA
CTGATTGGTTTTCTTATGTATTTCCAACAGCCTGAGAGAGTTATACC
AAACAGATCAGCCATGCAAGGAGAGGACAGCGATTCTCGTAC
GGTTCGGTTAAT
CGGTTAGCGGTTTTTTTGCCCAGGCCTATTTTATTGGATCATTTTTCACA Chromosome5/intergenic K19M13 shared with A. thaliana
AAATAGTATTTTCTTGGCCTTTGTTTAAGTATTTTTATTACTTAAACCAT
GCAAGGAGAGGACAGCGATTCTCGTAC
GGTTCGGTTAATC
GGTTAGCGGTTTTTTTCCCCAGGCCTAACTTCGGTTCAATTTTGTTGGGA Chromosome1/intronic T23G18												intronic
TCCGGATCGAAGTGTTGACCATTCCACATTTCCACTCATACCACTGTTAG
GTTTCAACTTTTTCATGCAAGGAGAGGACAGCGATTCTCGTAC
GGTTCGGTTATTCG
GTTAGCGGTTTTTTTTGCCCAGGCCTATTCGGCTTGTGTTGGGTTAAAAG
CACGGAATGTATTTGCACCATCACCATCTTCAAATAAAGTATTTTCTACA Pseudoexonic?, chloroplast												intergenic
GTAGCACCATGCAAGGAGAGGACAGCGATTCTCGTAC PSII D2 protein
JPL_18
GGTTCGGTTATTC
GGTTAGCGGTTTTTTTGCCCAGGCCTATAATAGAGAGTTTTAACAAAATA
CAATTTATATCCAATAAAAGTTTTTGGGGGTAAGTAAAGAAATAAGATAG Chromosome1/intergenic F20D21												intergenic
ATTGGATGAAAAAAGGCCACGTGGTTGTCACAATGCTTTTCAAAAATCTT
ATCCAAGCATAAGTCTCCTTCGTACCTCTCGTCTCCGATGGATCCTTCTT
CTCTAACAATGACCAAACTCAGAAATTATAAGAAGTAAAGACAACCATGC
AAGGAGAGGACAGCGATTCTCGTAC
GGTTCGGTTATTC
GGTTAGCGGTTTTTTTGCCCAGGCCTACAGAGATTAGCATTTTGAGATTA Chromosome4/intergenic Contig.n.41												intergenic
GACAAAAGTTTATATATATAAACACGATCGCGATATGTGGCATGCAAGGA
GAGGACAGCGATTCTCGTAC
GGTTCGGTTAT
TCGGTTAGCGGTTTTTTTGCCCAGGCCTATATAGTGGTGGTACAAAACAA
TAGACCAGTTTTCGTTAATAGCTGAACTCACCGACGAACTGAATTACTCG
AGTTTCGGCAAAATTTTCAAAACTCAAAGAAACTGAAAAACCGAACTAAC Chromosome2/intergenic F26C24												intergenic
CGAAAAACCGAAGTCCCGTGACTATATATGGTGATCAGACCTAAAATCCA
TAAATCTACTAAATTTATAGTATTAAACTGCTATAATCAATAACTAAATT
TGAATTCATGCAAGGAGAGGACAGCGATTCTCGTAC
JPL_19
GGTTCGGTTAA
TCGGTTAGCGGTTTTTTTGCCCAGGCCTACTGAAAACAGTGAGGATGTGG Chromosome5/exonic, disease resistance MBK23												exonic
GTTTGCAAAAAGCTACAAGTTGTTCCAACAAAAACTTAGCATCGCTTGAG protein (TIR-NBS-LRR class),putative
AAGTTCGACACGGACCATTCCTCACGAGTGAGAAGTTTTGTAGATATTTC AT5G40910
TACGAATATCAAGAATCTCTGTGTAGGAGGTTCATCAATTGTTGGTCGTT
GGTCTCATCGCAGAAGGCTTAATGTACGAGGTAGTGACCTCAGGATATCA
ACACATGCAAGGAGAGGACAGCGATTCTCGTAC
GGTTCGGTTATTC
GGTTAGCGGTTTTTTTGCCCAGGCCTACCATAAACTGATTCATAGATAAA Chromosome5/intergenic K22G18												intergenic
TACATTCATAAACTAATTCAAATTATTTGTAAATACATTCATTCACATAC
GAGATATCGTAAACGACACTCACCTTCAGCCACATTTCATGCAAGGAGAG
GACAGCGATTCTCGTAC
GGTTCGGTTAATC
GGTTAGCGGTTTTTTTGCCCAGGCCTACCCACCGGCGTCAGAGAGACCAA Chromosome5/intergenic F21E10												intergenic
AGTCCCCTGAGAGAGAGAAAGACAAAACCTTCGCATTCGCTGCTTTCTCT
GTAACCGCCATGCAAGGAGAGGACAGCGATTCTCGTAC
GGTTCGGTTAAT
CGGTTAGCGGTTTTTTTGCCCAGGCCTATTCTGAAGAATAATTAATGATG Chromosome2/intronic F13H10												intronic
GCAAATTTATGTTTTGTTTGATACAATGCAGAGAAGGTTGTGAGGGCCCG
CACGAGCACCAACGAACAGAACACGTGTGTGGACGACCATTGGGCCTTGC
CTTTGACAAATCCACTGGTGACCTTTATATAGCCGATGCTTATATGGGCC
TTCTTAAAGTTGGCCCAACAGGTGGTGTAGCCAATCAAGTTTTGCCACGT
GAGCTGAATGAGGCCCTTCGATTCACCAATTCATTGGATATCGATCCACG
AACCGGAGTTATCTACTTTACCGACAGTAGTTCGGTTTATCAGCGGAGGT
AAACTATGGGGAATTAAATTATTAAATTATCTTAAATAGATAACATGCAA
GGAGAGGACAGCGATTCTCGTAC
GGTTCGGTTAATC
GGTTAGCGGTTTTTTTGCCCAAGCCTATTCATACATATGAAGGGAGTTAT Chromosome5/intronic T24H18												intronic
ACAAGATAAATCCTTTTCAGTGACCAATAAGAAGTCAATTTAACAGCACA
AGAAATGACACAGCATATATATATTTAAGGGATGAGAGGAAACTACATAC
AATATAGTGTCCAACAAGCTCTGGTGGTTGTACAAGTTGCTGATCATGCA
AGGAGAGGACAGCGATTCTCGTAC
GGTTCGGTTATTC
GGTTAGCGGTTTTTTTGCCCAGGCCTATACAGAGGTCACCTTACCGACCG unknown unkown unknown												intergenic
AATCCGATATATGGGCCCTAAATTTGAGTTATATGCAAGGACATGCAAGGA
GAGGACAGCGATTCTCGTAC
JPL_20
GGTTCGGTTATT
CGGTTAGCGGTTTTTTTGCCCAGGCCTACGGTTTCTTAGCTGCTTTGGTC Chromosome5/exonic,nodulin related gene K9E15												exonic
TATGAATCCCATAGCGTGGCTGGGTCAAAGACCGAGTCGGTTATATGTAT AT5G54275
GGGACGAGACTGTTATCTCCTAACGTTTGTGTGGTGGGGATGCTTGTCGG
TGATTGGACTATCTTCAAGTGTTGTCTTGTTTCTGAGAACCAGAAGAGCC
TATCAACGTTTTGAACAAGATCGGATCACTTCGAGCATGCAAGGAGAGGA
CAGCGATTCTCGTAC
GGTTCGGTTA
ATCGGTTAGCGGTTTTTTTGCCCAGGCCTACTGTCCCGTATAATAATTCT Chromosome5/intergenic 140bp from T22P22												intergenic
CATCACTAAACTCTAATTTTGACTTTCATATGTTTTGAAGCAATAAGCTA
TTTAGCATACATTGAAATTCAAAAAAAAAAAACCAATTTTCATTTCAACC
AATGGGCAAAATATGATCCATAACGTTAAAAATCAAAGTGATTGAAGGAT
TGGTGTGGTGGATTAAAAATTTGGTGTTGATAATGCTGATAGTTTTCTAT
TGGGCCAGCCAGATTTGTTAAATTTTTGTTTTTACTTCGTCCAGGTCACA
CGCATTCTGTTTCTCAATATCAAACAAAAAACACTCACGCTCAAATCCTG
GCGCGTCTATNTCAAACTCCTTCAGAAACATGCAAGGAGAGGACAGCGAT
TCTCGTAC
GGTTCGGTTAATC
GGTTAGCGGTTTTTTTGCCCAGGCCTAAACAGAGGTCACCTTACCGACCG
AATCCGATATATGGGCCCTAAATTTGAGTTACATGCAAGGAGAGGACAGC cloned in JPL_32 and JPL_19 Unkown
GATTCTCGTAC
JPL_32
GGTTCGGTTAT
TCGGTTAGCGGTTTTTTTGCCCTGGCCTAACCCTAACATTGGTGACCAAA Chromosome5/exonic, PPR gene AT5G46460 K11I1												exonic
GATGATTTTTGGTTTACACGAGGAATGACAGATTGGTTTTTTTGCGTTGA
ATCTGTTCGAAGAAACGCCTGAGAGAAGTGTTGTTTCATGCAAGGAGAGGA
CAGCGATTCTCGTAC
GGTTCGGTTAAT
CGGTTAGCGGTTTTTTTGCCCAGGCCTACGCTGGCCCTTGGGGAAAGAAA					unknown
TTCTGGTTTTTTCCATGCAAGGAGAGGACAGCGATTCTCGTAC
GGTTCGGTTAATC
GGTTAGCGGTTTTTTTGCCCAGGCCTACACCAGACAATTCAAAGACAAAG Chromosome4/intergenic Contig.n.87												intergenic
AGTGCCGTCAAATCGAGATGAGGAAAATTAGGAAAAAATAAACAATAAAT
AAAAACCCTACCGACTGTGGGTCCCCACTACGGCACTCCTGCCGCCTTCT
CCGACTGTAATCCGCCGTCACCTGCCGGTTTTATTAAAATTAGGAATTTA
TTTGAATTATTTTTCTCACCCGAAGTCTAAGGATGATGGAGCAAGGAGCT
TTGGTGGGTTCTTCTTCTTCAAGTTGCTATGTTCCTTTCCAATTTCGACA
ATCAAAGACGTTTTTTTCGTCATTCAAGCCAAAAAATAAGCTAAACCCTG
GTCAATTCCGGTTTAGCTGTCCATGCAAGGAGAGGACAGCGATTCTCGTAC
GGTTCGGTTATT
CGGTTAGCGGTTTTTTTGCCCAGGCCTACGCTGGCCCTTGGGGAAAGAAG Chromosome4/intergenic Contig.n.22												intergenic
TTCTGGTTTTTTCCATGCAGCCACTAAAGGAAGGAAAGCAGTCAACAGTT
GCTCTGTTATGGAGACTGAAGATGGACAAATTGTGTATGAAGAAGAGCAA
ATCACGTCTGTTATCTCCGAGTATTTCAAGAAAATTTTTACCTCAGAAGG
TCATGCAAGGAGAGGACAGCGATTCTCGTAC
GGTTCGGTTAT
TCGGTTAGCGGTTTTTTTGCCCAGGCCTACGCAACACAATGCTTGCATTG Chromosome2/intronic section 205 of 255												intronic
GAGATATGATGAGCATTTGATATGCCAATTTCAGATAGTCATTGATTCTT
GTTGTGCCACTGTTGCTGAAGTTCAAAAGAGAGGGAAGGATTTCTGGGCG
GAGTTTGAGTTGTATGTTGCTGATCTTTTAGTTGGAACTGTGGTTAACAT
TGCTCTGGTCGGTATGTTGGCGCCTTATGTCCGTTTTGGTCAGCCATCCG
CATCACCTGGCTTCTTAGGACGCATGCAAGGAGAGGACAGCGATTCTCGTAC
GGTTCGGTTATTC
GGTTAGCGGTTTTTTTGCCCAGGCCTATACAGAGGTCACCTTACCGACCG Cloned in JPL_19 and JPL_20 unknown
AATCCGATATATGGGCCCTAAATTTGAGTTATATGCAAGGACATGCAAGGA
GAGGACAGCGATTCTCGTAC
JPL_48
GGTTCGGTTATT
CGGTTAGCGGTTTTTTGCCCAGGCCTACCTATGACAAAGGTATATCAGAT Chromosome1/exonic,no mRNA data F19K19												exonic
ATATTTACTCGTTTAATTATATGCATTTAGGATTTGATTTACTGATGAGT
TCCAACTAAACAAGACTGGTTGATGCTTTCTGACATGCAAGGAGAGGACA
GCGATTCTCGTAC
GGTTCGGTTAAT
CGGTTAGCGGTTTTTTTGCCCAGGCCTATTCACCGAGTTCTTTAAGGCTC Chromosome3/exonic,no mRNA data, MWL2												exonic
CTATGACCAACGGTATGGCTCTTGGTTCAGCGGCCGTCGTAGTTATGGCA clone asmbl_9543
AGTAAGCGAGACCTTCTCATGCAAGGAGAGGACAGCGATTCTCGTAC
GGTTCGGTTAATC
GGTTAGCGGTTTTTTTGCCCAGGCCTACTTTACAATATGGTGAAGAGGTT Chromosome5/intergenic K1L20												intergenic
GGATATATGATTTTGCTATTTTTTGTTTTTTTGTTGTCAACAGTAACGTT
CATCCATTTCATAAATACATTTTTTTACAGCCTCACTTCCATTTAATGTA
TTTTGGTATTTCAATTAGAAAATGACTATNGTACCCCTCTTCGCATTAGT
CAACTATTTTCAGTTATTTACTTAGTCTGTATTTTGATATACTGAAGCAA
TTGAAACATGCATAATGCAGTAGATCAGTCAGAAATTCGTCAAGATTTTT
TTTTGATTAACTGGTAAATTAATTAAGATTCATGCAAGGAGAGGACAGCG
ATTCTCGTAC
GGTTCGGTTAATC
GGTTAGCGGTTTTTTTGCCCAGGCCTATTATTAATGTTAGTTTTGAAATT Chromosome4/intergenic T4C9												intergenic
GACTCAAAATCATTTACATGCAAGGAGAGGACAGCGATTCTCGTAC
Arabidopsis suecica
GGTTCGGTTATT
CGGTTAGCGGTTTTTTTGCCCAGACCTATTTAGGACGCCTCATTTACTTG 40bp from retrotransposon T6D9												intergenic
GGTGTTACACGTCCTGATCTGGCGTTCTCGGTTCATGCAAGGAGAGGACA
GCGATTCTCGTAC
GGTTCGGTTATTCGGTTAGCGGTTT
TTTTGCCCAGGCCTACTTTAGACTAAGAAAATTTGAATGACATTGATGAT Chromosome5/intergenic F8F6 shared with A9												intergenic
ATAGTGAGGCACAAAATATCTGTCTCTAATAATTTCAGGCTTAATAGACA
TATTAAATGAGGTTGGAGAATTAATTGAACAGGGAATATATAATGTGGTT
GTTAGTTCGATAATAATAATTCATTGTGGAAAAATCAGGAGATATTTCAA
TTAAGAGACACAAAAGCACATATAGTTGATATTAATACTTGTGACATGCA
AGGAGAGGACAGCGATTCTCGTAC
GGTTCGGTTATTC
GGTTAGCGGTTTTTTTGCCCAGGCCTACCGTTGACAATCTCAATAGAATT Chromosome5/intronic K12B20												intronic
TCTTGTGATGATTTTTATCAAACCTGGCTGGTCACCAGTTCTCAAGAACA
GTACTAAAAGGTGATTGTATTCGTAGAATTTCTATCAAACAGCATGCAAG
GAGAGGACAGCGATTCTCGTAC
GGTTCGGTTATTCG
GTTAGCTGTTTTTTTCCCCAGGCCTATCTTCGGTTCAATTTTGTTGGGAT Chromosome1/intronic T23G18 shared with Care-1												intronic
CCGGATCGAAGTGTTGACCATTCCACATTTCTACTCATACCACTGTTAAG
TTTCAACTTCTCCATGCAAGGAGAGGACAGCGATTCTCGTAC
GGTTCG
GTTAATCGGTTAGCGGTTTTTTTGCCCAGGCCTACCCTGAGCAATAAT
TGTATCCTGAGTTGTAATAGAATCAAAGTACGATGAGAGTGTTTTTAT Chromosome5/intergenic F8F6 shared with A. thaliana												intergenic
GACAAATATCTTAATCTTGGCCAATTATATGTTCTACTGAAATTCTTT
TTGAATTCATCGACCAGTGAGACTTAAAAATAGCTTTTTATTCGCCGA
GGTATATATAGCTAGGAATTTTGTCGGAATTTAGACGTTAGTGGGTTT
TGTTCTTCGTGACACAAAAGATATTCTATATATTAACGAAATCTAGCG
ATCGATATGGTATTTATATAAAGTCTTGGTCATAGATAGGGGTTGAAA
CTTGAAACCATGCAAGGAGAGGACAGCGATTCTCGTAC
Arabidopsis lyrata
GGTTCG
GTTATTCGGTTAGCGGTTTTTTTGCCCAGGCCTAATTTGTAGGGT Chromosome3/intronic T9J14
CGATATACAAGTTTTAAAGCCTCCCAGACGTAGCGGACCGGTCGT into a cassandra retrotransposon
CGGAAGATGGTGGGCCCACAGACCGAGAGAGGACGACGGGCCCAT
TAAGAGAGATGGCGGTCGGGGCGTTACATTAGTAAGTAGGGAGGA
AACAGTGAACAAACCAATCTAAGAATACCAGACTTAGCATTGAGC
AGAAGCACAAAAACTGCTAATTCAAATCCAAATAATTAAACACGG
CAGTATCAGATCGAATTAAAAGGAATTTGGTTTAGCTTAAAACTC
ATGCAAGGAGAGGACAGCGATTCTCGTAC
GGTTCG
GCTCGGTTAATCGGTTAGCGGTTTTTTTGCCCAGGCCTATTGATT Chromosome 2/ intergenic F12L6
GATATCAAAGTCAAGAGTCAGATTAGCCTACCAAATCGAAGTGTC
AGTGATTCCGCCTCAATAATATAATTTCGTAATGTCCATCAACAA
TTATCTAGCCTCTTCCATCAACCAATCACAACTTTATGTAGTAGG
CTAGTAGCTAGCATTCATAATGATATCCCAATTTTAGATTTGTTT
CCTTTCGTCATACCACTTGATGGCTTCTTTAAATCCCTTTATTCT
CTTGAGTCCGTGACCAACACTTTTGCAAGCAAAGTGGAATCATGA
AGCCGAATTCTGCAGATATCCATCACACTGGCGGCCGCTCGAGCA
TGTAC
GGTTCGG
TTAATCGGTTAGCGGTTTTTTTGCCCAGGCCTAGACAAGACGTAG Chromsome 3/ intergenic F24B22
AGCTAAAACAGTAAATAACAAAGACGAAAAAAAGA
AAAGAGATGCACATGCAAGGAGAGGACAGCGATTCTCGTAC
GGTTCG
GTTAATCGGTTAGCGGTTTTTTTGCCCAGGCCTAATCCCACAAAA
AAAGGGTAAAGCTTTTTCTATGCTAAAAGTTGTGT Chromosome 1/ intronic F24J5
CGGAAAATCAGATACTCTTTACAATGAAATTCTCTCTTCCACCA
TGCAAGGAGAGGACAGCGATTCTCGTAC
GGTTCGGTT
ATTCGGTTAGCGGTTTTTTTGCCCAGGCCTAGAAACAACTAAG Chromosome 4/ intergenic F4C21
AAACTGTGTTTATGGATTTGTTTAATTTTTATTTTAG
AAACAAATTTGACTGATGCTACTATTGCTTCAGATCAGTACTA
AAATCCATAATTAATTAATTAATGATAAACTCTACTT
AATTAATCAATGATTTAACGTCATGCAAGGAGAGGACAGCG
ATTCTCGTAC
GGTTC
GGTTATTCGGTTAGCGGTTTTTTTGCCCAGGCCTAGCAATATA Chromosome 3/ intergenic F5N5
CTACAAAATGGAATTATAAGTAACATTGAAAAACACG
AAAAAGGAAGTGAAGATTCGTCTCCCCAAAACGAAAAGCTGA
TTATACTTTCCCTCTACAGCAATCAAGTTATCAAAACC
CTTTTTCTTATCACTTTATTTCCCTTTTTTCCCTTGTGTAT
AGATATGGGAATATATATGTAATATAGACATGCAAGGAG
AGGACAGCGATTCTCGTAC
GGTT
AATCGGTTAGCGGTTTTTTTGCCCAGGCCTAACCGTGAGCTA Chromosome 2/ intergenic T15D9
TGGGAGGCAATGAAAGTACCAATCTCAGAAGGTCCAAA
GTTCAATGAGTTGCGAACTGTGATGGATCTTAGCAAGGCA
TGCAAGGAGAGGACAGCGATTCTCGTAC
GGTTC
GGTTAATCGGTTAGCGGTTTTTTTGCCCAAGCCTAGTCA
GCGCTCTGAGCTTCTATTTTAGCTGAGACTGAGCCTGGCAG Chromosome 5/ intergenic T1N24 gnl|ti|1677452815*
CCAGCCATGCAAGGAGAGGACAGCGATTCTCGTAC					shared with A. thaliana
GGTCGGTTATTTGGTTAGCGGTTTTTTTGCCCAGGCCTACTTCAGCATA Chromosome 1/ exonic F4H5
TGTCTTTGACTCGTCCTTGCTTTCCTGTTCCTTTGCGTCACAGCCAAAGG clone asmbl_385 unknown mRNA sequence,
AAACATCTTTCTTGAATGCAGAAGCTTGGAATCATCGATCAGACTAGCTG AT1G06925
CATTGGCATTGTAGATTCATTAAAATTTAGATCAAAGGTCTACAAAATCGA
AAATATATATAGTTACAAATTAAAGAAAAGAAATTGTTGTTACACGGTGAA
CTTCTGGGTCTTATCTGGCTCATCCTCTGCTCCTTATCAGTATTGAGAAAA
CAGAGACGAGACAACAAACTAGAAGAAGAAGATTGTGTGGTCGTATT
GACATTGTGAAAACGAGCATGCAAGGAGAGGACAGCGATTCCGTAC
GGTTCGGTT
AATCGGTTAGCGGTTTTTTTTCCCAGGCCTAGGAGAGCCTACTTTCTAGA Chromosome 3/ intergenic MDB19
GAAAGTAAGAGCAAAGGTGTCGGTAGGATAAGGGAACTGCAGTTATATGA
AGCACTTTGTGATGCCAAGAAAGGATAGCTTTCACGATATCGAAGAGTCT
CAATCGCCAAACCCTAGCTTGACGAGATCAAAGTCTCAAAGAAAGCTGAG
ATTTGCGTAAGAGGATGTTCCACCTACGGATCTGAAATCGTTGATGCCTG
ATCATAGGTCGTGTCCTAGAAAATTGAAAAGTCATTTCCCTCTGTGTCAG
CCGTTGTCCAATTCATGGAAAGAGCATAGTGTATCATTTTCACATGCAAG
GAGAGGACAGCGATTCTCGTAC
GGTTCG
GTTATTCGGTTAGCGGTTCTTTTTGCCTAGGCCTAGTAAAATATATGT Chromosome 5/ intergenic MIF21
ATATATGCACATTGTGACATATGTGGAAGCCT
AAGACAGCATGCAAGGAGAGGACAGCGATTCTCGTAC
GGTTCGGTTAATCGGTTAGCTGTTTTTTTG
CCCAGGCCTACCTATATATTTACAATTAGCAAACTTAACAAATAC Chromosome 1/ intergenic F3C3											gnl|ti|1677577145*
TCCTTGTAACATGCAAGGAGAGGACAGCGATTCTCGTAC
GGTTCGG
TTTTCGGTTAGCTGTTTTTTTGCCCAGGCCTAGACAAGACGTAG Chromosome 3/ intergenic F24B22
AGCTAAAACAGTAAATAACAAAGACGAAAAAAAGAA
AAGAGATGCACATGCAAGGAGAGGACAGCGATTCTCGTAC
GGTTCGGTT
ATTCGGTTAGCGGTTTTTTTTGCCCAGGGCTAGTTCTTAGTGAA Chromosome 5/ intergenic MAJ23
TAATGTGAAACAAGAAGAATTCTACTGAAACGGAGC
GAGCCAGGCCATACATCTAAGGTCAATTAGAATATAAGCCCAA
CTAACTTGGGCCCAATTTAATGATCTCGCGTTGAAGC
CACGCGCGGCTCTCGTGGCTTCCCATGCAAGGAGAGGACAG
CGATTCTCGTAC
GGTTCGGTTAATCGGTTAGCGGTTTTTTTGCCCAGGCCTAAT Chromosome 1/ intergenic F13F21 gnl|ti|1677472239*
CGCTACTTTTAGAAATAAATT
GTCCCACGGTGCACCGCGGTTTAAAATCATGCAAGGAGAGGAC
AGCGAT
TCTCGTAC
GGTTCGGTTATTCGGTTAGCGGTTTTTTTGCCCAGGCCT Chromosome 3/exonic, unknown F21O3 gnl|ti|1681311485*
ATTAGCAAGCATCACATCGTAC protein, AT3G07480
CTAAATGACTCAATCCCATGCAAGGAGAGGACAGCGAT
TCTCGTAC
GGTTCGGTTAATCGGTTAGCGGTTTCTTTGCCCAGGCCT
ATGCAAGATGGCTGGTTAGAACTC
AAGGGGAGGTCTAAATGGCAGCATAAAGCCATAAGGGAGC chromosome1/ intergenic F16I10
TAACTGACACCGTGAGAGAGCTGTAGGATCAAATCAAGAA
GCTCCATCGGATAGCCAACCAAAAACCACTCCAAATCAAG
GACATCCCAAATGATGAAGCGT
CTACTCTGGTCGGCGCAAAGGGGAGTGAATTCACTTCAGCAT
GCAAGGAGAGGACAGCGAT
TCTCGTAC
GGTTCGGTTATTCGGTTAGCGGTTTTTTTGCACATGAAAC Pseudoexonic,A.thaliana partial gnl|ti|1700801945*
GTATGCTTGCATATTCGTCCAT chloroplast ndhB gene
AGGTCAAATCGGATATGTAATTATTGGAATAATTGTTGGA
GACTCAAATG
GTGGATATGCGAGCATGCAAGGAGAGGACAGCGAT
TCTCGTAC
GGTTCGGTTAATCGGTTAGCGGTTTTTTTGCCCAGGCCT Chromosome1/ intergenic F10B6
AATCGTTTCTTACTCCTCCTTTTC
ATTAATTTTTTTTTTTAATATTGTTGAGAGATTTGATCAGA
GACTTTCACTGTGGATACTCTAAACTCTAAAGGATCATCAA
TGAAAGTCCGAAACGACCCATAAAGTCAAATCTCATTTATTTAGAGA
ATTCACCAAAATTCGTCCTCTTTTTAGAAATATGTCGTCAAATGGAT
CCGAACTTTAACAAAAGCCGTGACTTACTCATGCAAGGAGAGGACAGCGAT
TCTCGTAC
GGTTCGGTTATTCGGTTAGCGGTTTTTTTGCCCAGGCCTACTT Chromosome 1/intergenic T14P4 gnl|ti|1512281807*
GGAGTATGATGAAAGAAATCTATAAATAAGTCTAAAAAATACACATGCA
AGGACATGCAAGGAGAGGACAGCGAT
TCTCGTAC
GGTTCGGTTAATCGGTTAGCTGTTTTTTCCGGGTAG Chromosome2/ intergenic F13M22, T8P21, F16M14
GAGGTTAGGACCCATTCGGGTATTTTT pseudogene related to AT2G31700								shared with A.thaliana
AAAAATCGGGTTCGGGTTCGGTTCGGGTATTTTTC
GGGTTTTTGGTTCGG
TTAATCGGTTAGCGGTTCTCGTACGAACGGTTACGAT
TCGAGAAGGGAGC
AAGGACATGCAAGGAGAGGACAGCGAT
TCTCGTAC
GGTTCGGTTATTCGGTTAGCGGTTTTTTTGC Chromosome 5/ intergenic K6M13
CCAGGCCTAAAGTCAAGAGAGAAACAGTCT
TCCCGAACAACGGAACAAAACAAGAAATTAC
GGTTTTGTTTTATTAACCA
CGAAACCGGCCGGTTCCGTCTTAATTTT
GAAAAATCTTGAAATTGTACCA
TTTGGTTTGGTATTATTTGATTTCATGC
AAGGAGAGGACAGCGAT
TCTCGTAC
GGTTCGGTTATTCGGTTAGCGGTTTTTTTGC Chromosome 2/ intergenic F19G14
CCAGGCCTATCCACAGCATTGTAGTGCCCA ~ 50 bp from (SQUINT) (SQN) mRNA
CTTGTTGACTATTTCTGCATTTCTTTACACA
TGCAAGGAGAGGACAGCGAT
TCTCGTAC
GGTTCGGTTATTCGGTTAGCGGTTTTTTT
GCCCAGGCCTATTCAGCGGGACGGAACTATGGT Chromosome1/ intergenic F20P5 gnl|ti|1678876437*
CGGAAATTATAAATATATCATCGGAAAATTGGT
TGAAAATATTCGTCGGAATACCGTTGAAAAGTT
CCAATGAAATTATATAATCGAAATCTGGTAGAAA
GCTCACAGGAAAAACCGTCAGAAATGTGTTAACTT
TACACATGCAAGGAGAGGACAGCGAT
TCTCGTAC
Wright etal 2001 Chromosome 1/ intergenic F1O17
Wright etal 2001 Chromosome 5/ intergenic T32B20
Wright etal 2001 Chromosome 3/ intergenic F1I16
A. thaliana
GGTTCGGTTAATCGGTTAGCGGTTTTTTTG
CCCAGGCCTAGTATCAAGCAACAAACGAATCA Chromosome 3/ intergenic F28A8
TTTGCTCGTGAGAATGGTACAATATTCT
GTCCATGCAAGGAGAGGACAGCGATTCTCGTAC
GGTTCGGTT
ATTCGGTTAGCTGTTTTTTTGCCCAGGCCTATC
GTTGACAATCTCAATAGAATTTCTTGTGATGAT Chromosome 5/ intronic K12B20
TTTTATCAAACCTGGCTGGTCACCAGTTCTCAAG
AACAGTACTAAAAGGTGATTGTATTCGTAGAATT
TCTATCAAACAGCATGCAAGGAGAGGACAGCGAT
TCTCGTAC
GGTTCGGTT
AATCGGTTAGCGGTTTTTTTGCCCAGGCCTACTCTG
AGCAATAATTGTACCCGCAGTTGTAATAGAATCAAA
GTACGATGAGAGTGTTTTTATGACAAATATCTTAATCTTGGCCAA Chromosome 5/ intergenic F8F6
TTATATGTTCTACTGAAATTCTTTTTGAATTCATCGACCAGTG
AGACTTAAAAATAGCTTTTTATTCGCCGAGGTATATATAGCTA
GGAATTTTGTCGAAATTTAGACGTTAGTGGTTTTTGT
TCTTCGTGACACAAAAGATATTCTATATATTAACGAAATCTAGC
GATCGATATGGTATTTATATAAAGTCTTGGTCATAG
ATAGGGGTTGAAACTTGAAACCATGCATGCAAGGAG
AGGACAGCGATTCTCGTAC
GGTTCGGTTATTCGGT
TAGCGGTTTTTTTGCCCAGACCTAGTTGCAGCCCAAAAC
CCCTGTCTCCTTCTTGCTGGTACTATCCGTCTCCACACACC Chromosome 1/ intergenic F24B9
CGCAATTGACGGGCAATCTCTAAGAACGTGCAAAATACTCT
CTTCTCCCCCCTTGCACACTTGACAAAGATTAGTATCAC
TTAGGTGTCGACGAAACCGCTCACCATTAGTCATAATGA
TTTGACTCCCTACCATCCAGAGAAAACAGCGAATTCGTTCA
GGTACACAAACCCGCCAAAGAATCTTAAAAAAGCTCATCAT
GCAAGGAGAGGACAGCGATTCTCGTAC
GGTTCGGTTAATCGGTTAGCGGTTTTTTTG
CCCAGGCCTAGTTTATTGGATCATTTTTCACAAAA Chromosome 5/ intergenic K19M13
TAGTATTTCCTTGGCCTTTGTTTAA
GTACTTTTATTACTTAAACCATGCAAGGAGAGGACA
GCGATTCTCGTAC
GGTTCGGTTATTCGGTTAGCTGTTCTTTTGCCCAGGCCTAAGTA
CTGTAGAATAGTTTTTTTTTTTTTCTTATGAAAGTAACATATGTATA Chromosome 1 / intergenic F9K23
CTATTTTGGGTATTATTATACTAGTATGTTACA
AAAGGAATAAAATAGTCTAAAACGTATAAAATTCCACTATTTGATT
GTATATTTTTCCGTTGAAAATATTTATCTTTATC
CCACCAAATATTATTATAGAAAAAGAATGAATATTTAAAATTTAA
GATATGAATACATAGTGAGACATGCAAGGAGAGGA
CAGCGATTCTCGTAC
GGTTCGGTTATTCGGTTAGCGGGGGGGAAC
AACGACTTTAGAGGGTTTGGTTGCCTGTTACT Chromosome 5/ intergenic F15N18
CCATGCAAGGAGAGGACAGCGATTCTCG
TAC
GGTTCGG
TTAATCGGTTAGCGGTTTTTTTGCCCAGGCCTAGTT
GCAATAACGCAACAAAGTGTATGAAAATAACTATGAA
ATACTTGGATTATGGTGAGGTTCAGTGAATAACATAAT
AATGAAACAATGCAGCTAAAACATGCAAGGAGAGGACAGCGATTCTCGT Chromosome 2/ intergenic T4C15
ACAAACGGTTACGATTCGAGAAGGGAGAGGACAGCGATTCTCGTAC
GGTTCGG
TTATTCGGTTAGCGGTTTTTTTGCCCAGGCCTAGTATCAAGCAAC Chromosome 3/ intergenic T28A8
AAACGAATTATTTGCTCGTGAGAATGGTACAATAT
TCTGTCCATGCAAGGAGAGGACAGCGATTCTCGTAC
GGTTCGGTTAATCGGTTAGCTGTTTTTTTGCCCAGACCTAGTT
AGGACGCCTCATTTACTTGGGTGTTACACGTCCTGATCTGGCGT Chromosome 3/ intergenic F16L2
TCTCGGTTCATGCAAGGAGAGGACAGCGATTCTCGTAC
